# Supplementary material for: Transcriptome-Mining for Single-Copy Nuclear Markers in Ferns
Source: PubMed Central journal article supplement (PMC3792871; doi:10.1371/journal.pone.0076957), 2013-10-08
Supplement: pone.0076957.s004.pdf [file pone.0076957.s004.pdf]

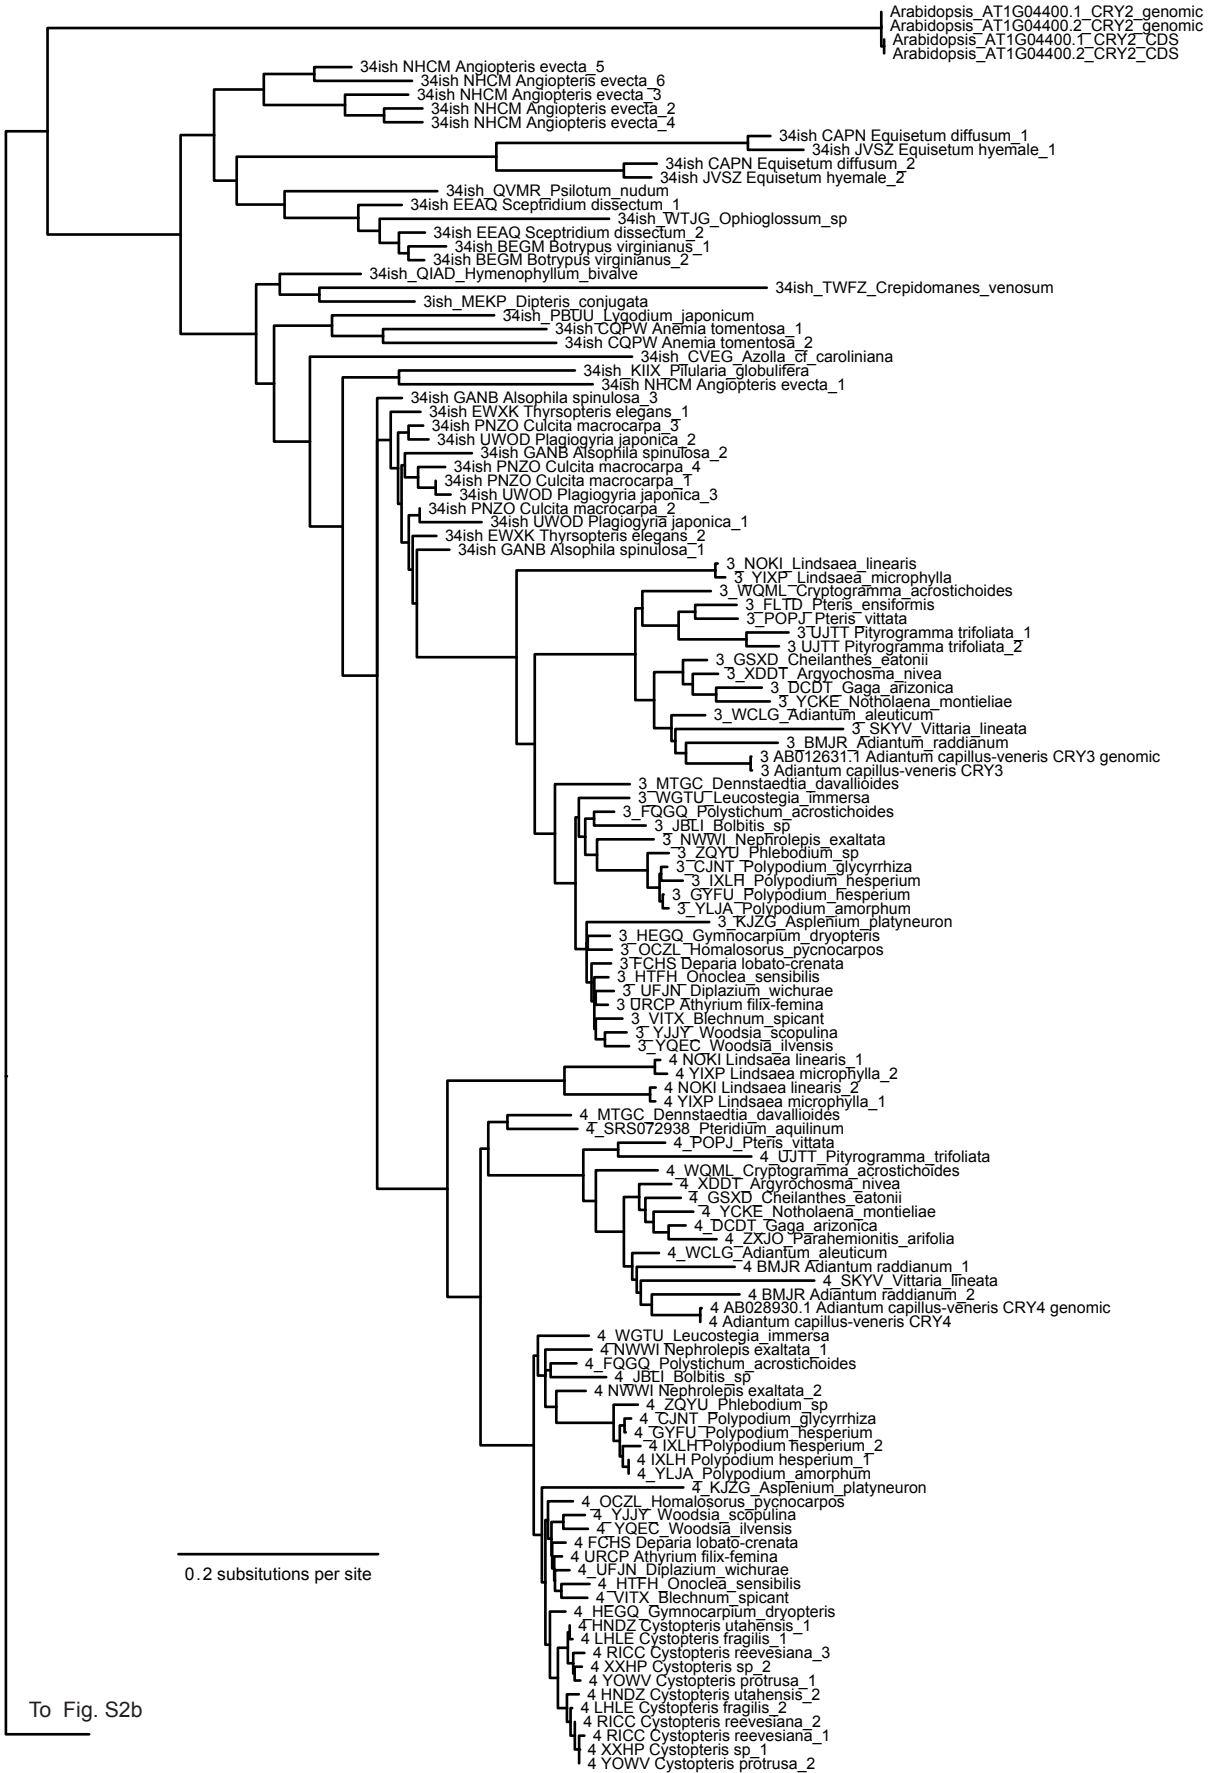

Figure S2a: CRY all-in maximum likelihood transcriptome phylogeny: preduplication CRY3/4, CRY3, and CRY4.

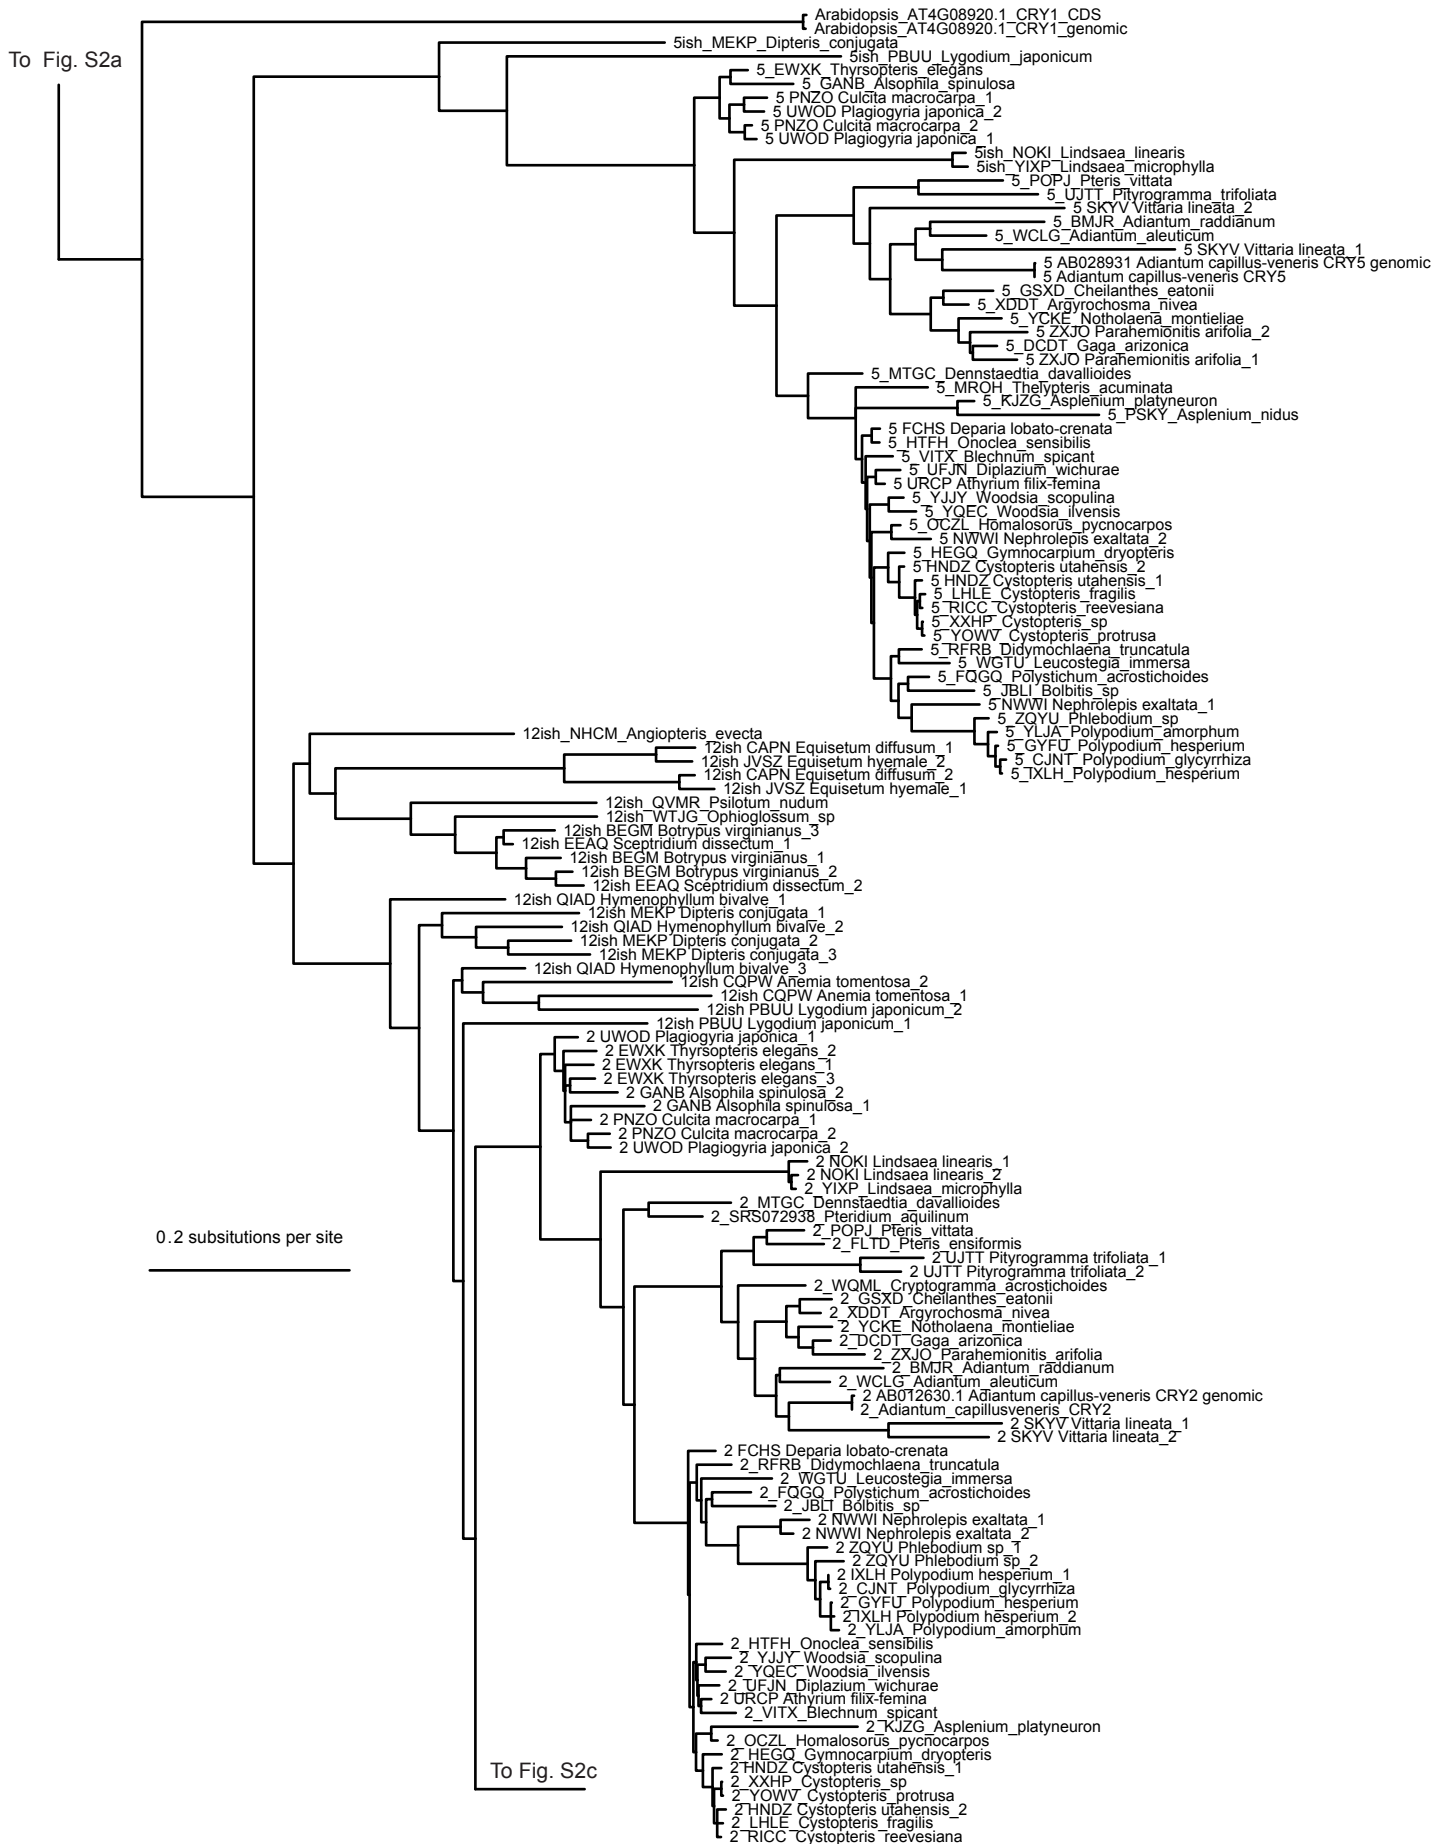

Figure S2b: CRY all-in maximum likelihood transcriptome phylogeny: CRY5, preduplication CRY1/2, and CRY2.

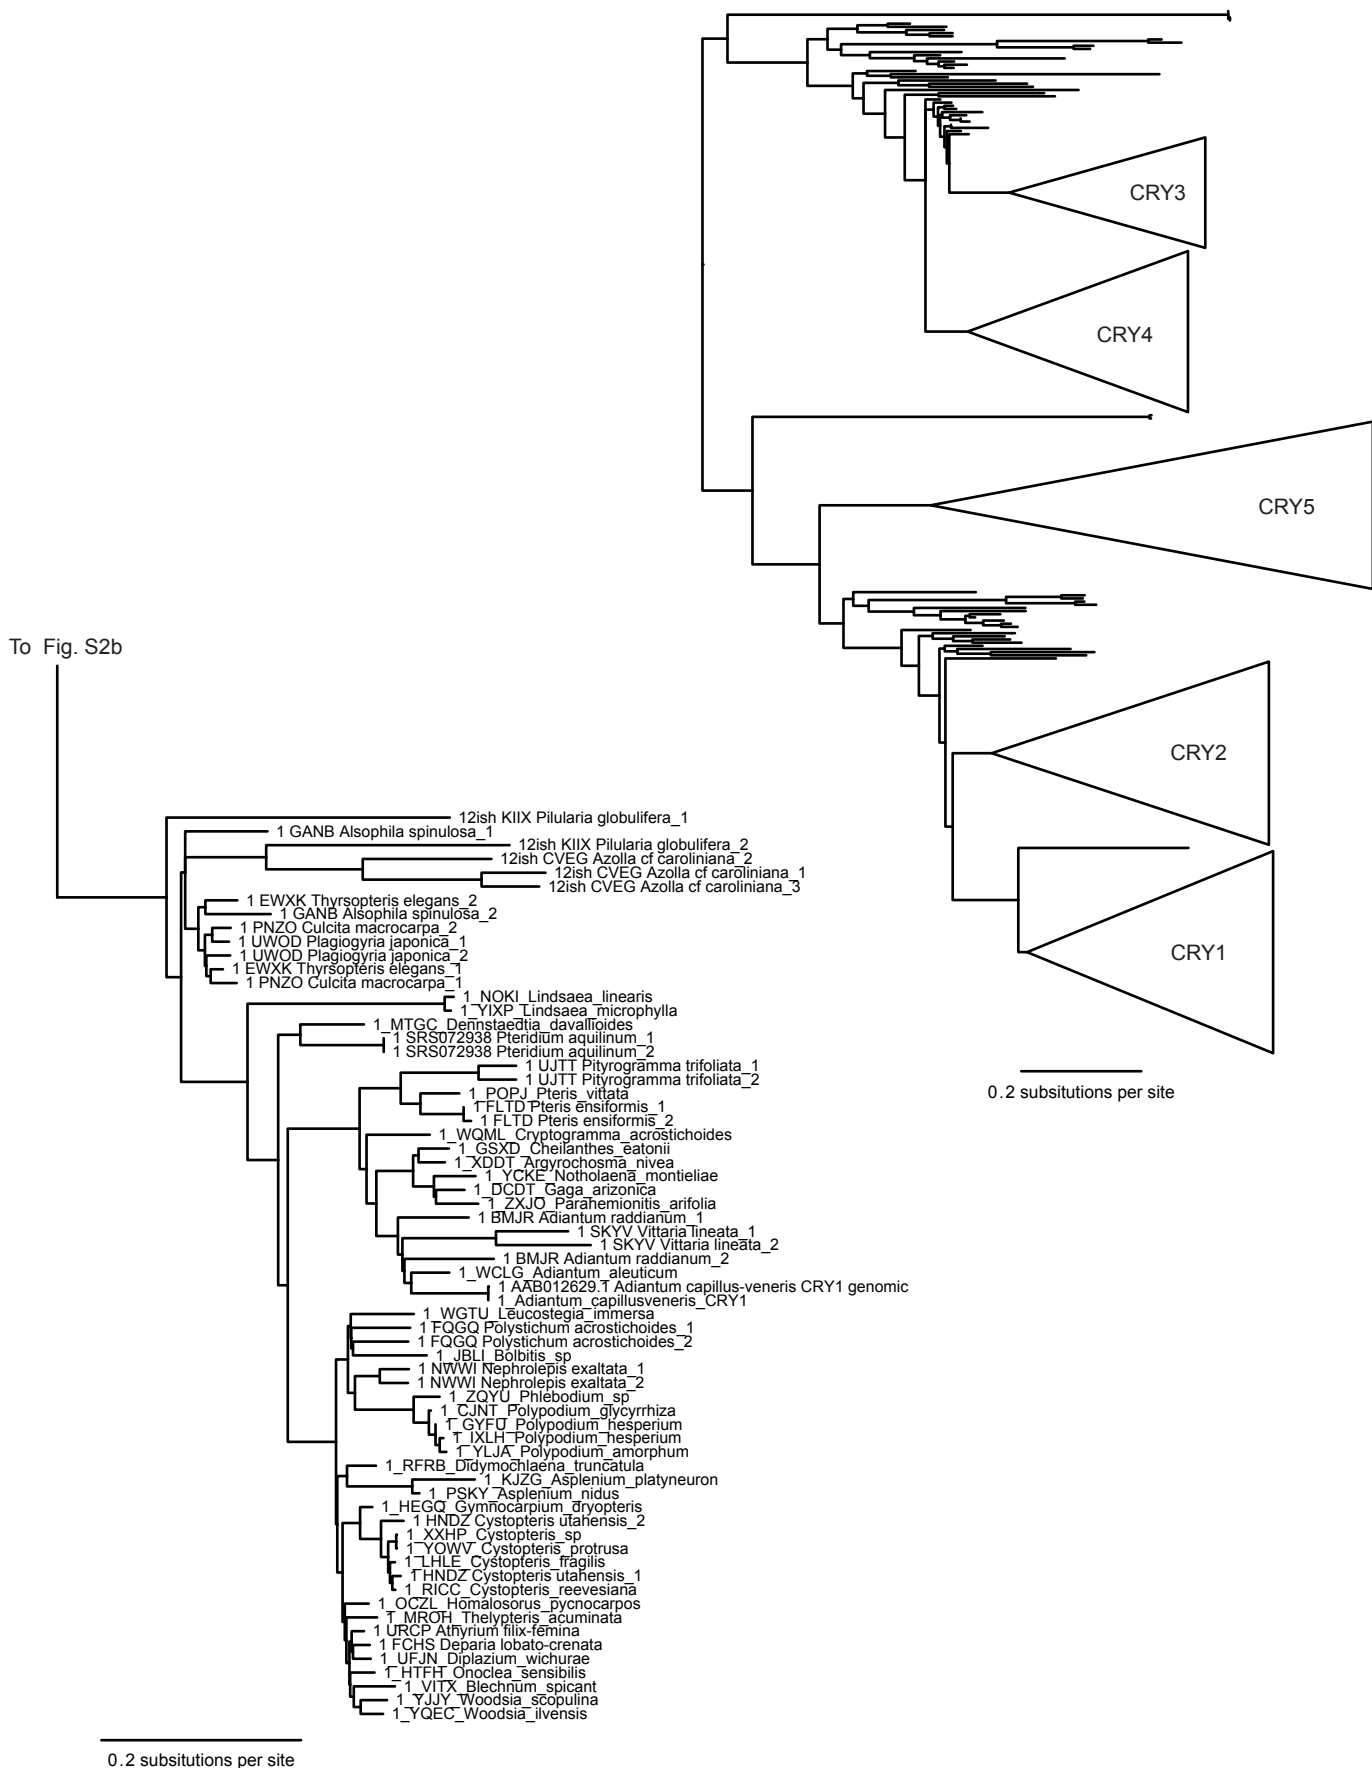

Figure S2c: CRY all-in maximum likelihood transcriptome phylogeny: CRY1, and a cartoon “map” of the entire cryptochrome fern phylogeny.
