# Supplementary material for: Transcriptome-Mining for Single-Copy Nuclear Markers in Ferns
Source: PubMed Central journal article supplement (PMC3792871; doi:10.1371/journal.pone.0076957), 2013-10-08
Supplement: pone.0076957.s006.pdf [file pone.0076957.s006.pdf]

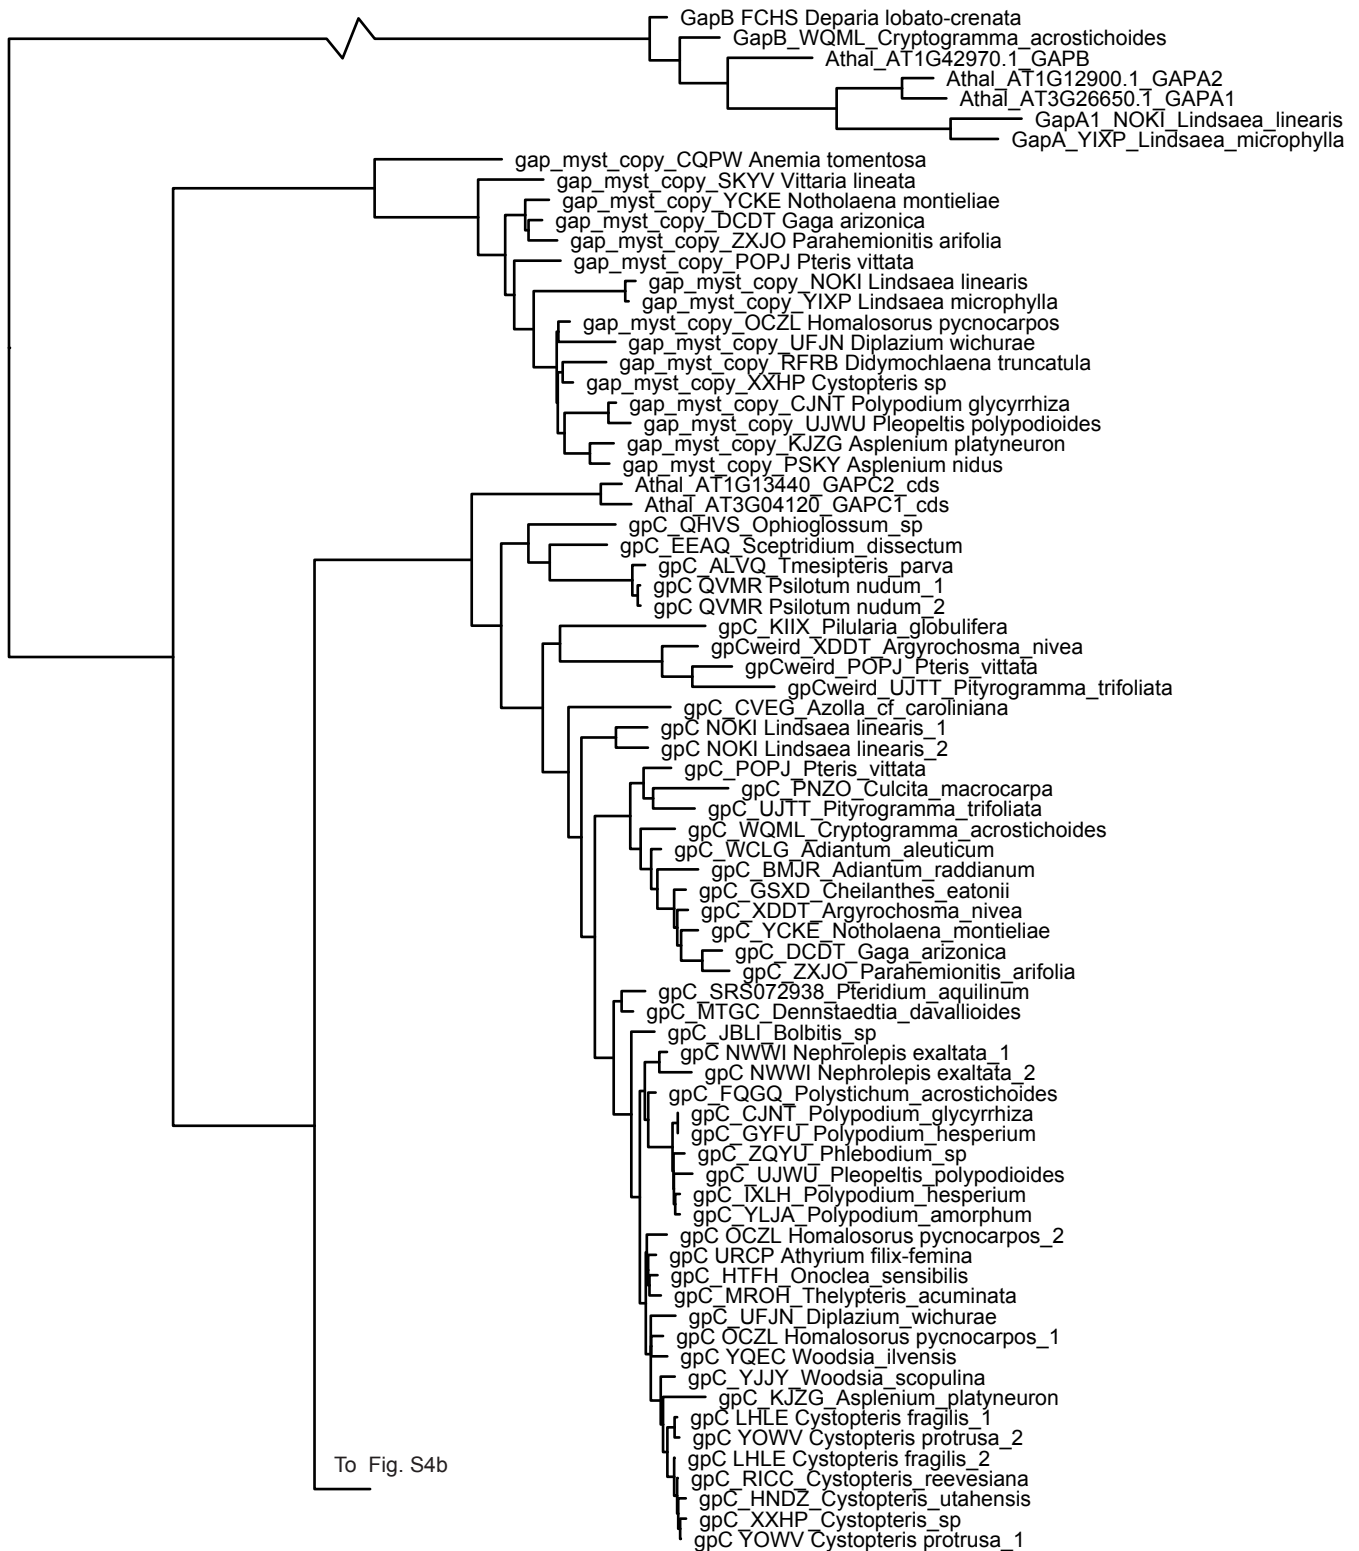

Figure S4a: GAP all-in maximum likelihood transcriptome phylogeny: gapA, gapB, mystery gap, and gapC.

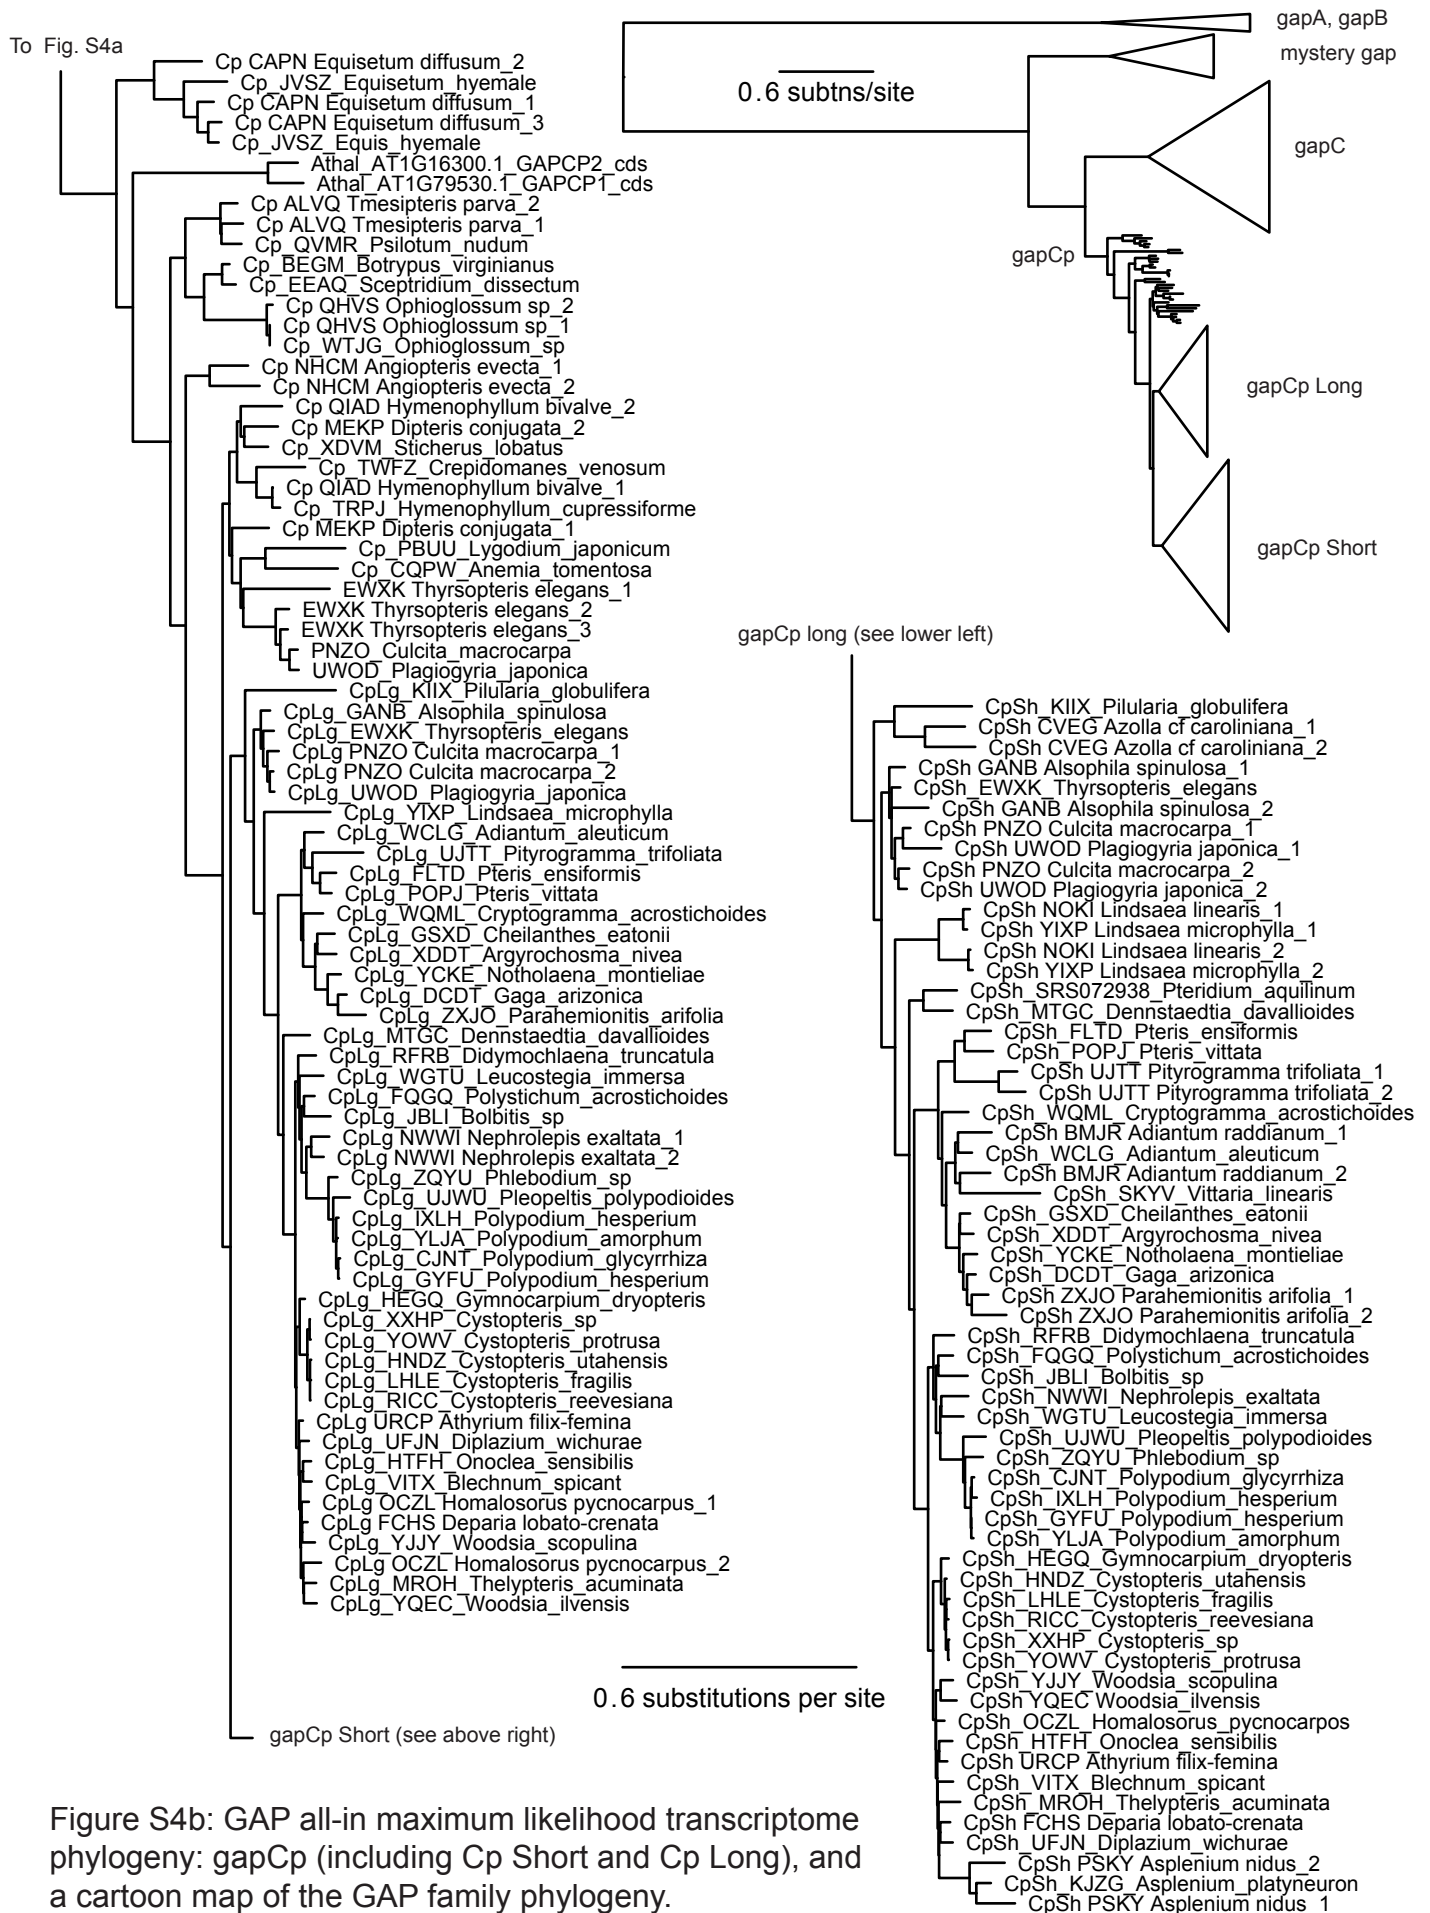

Figure S4b: GAP all-in maximum likelihood transcriptome phylogeny: gapCp (including Cp Short and Cp Long), and a cartoon map of the GAP family phylogeny.
