# Supplementary material for: Transcriptome-Mining for Single-Copy Nuclear Markers in Ferns
Source: PubMed Central journal article supplement (PMC3792871; doi:10.1371/journal.pone.0076957), 2013-10-08
Supplement: pone.0076957.s009.pdf [file pone.0076957.s009.pdf]

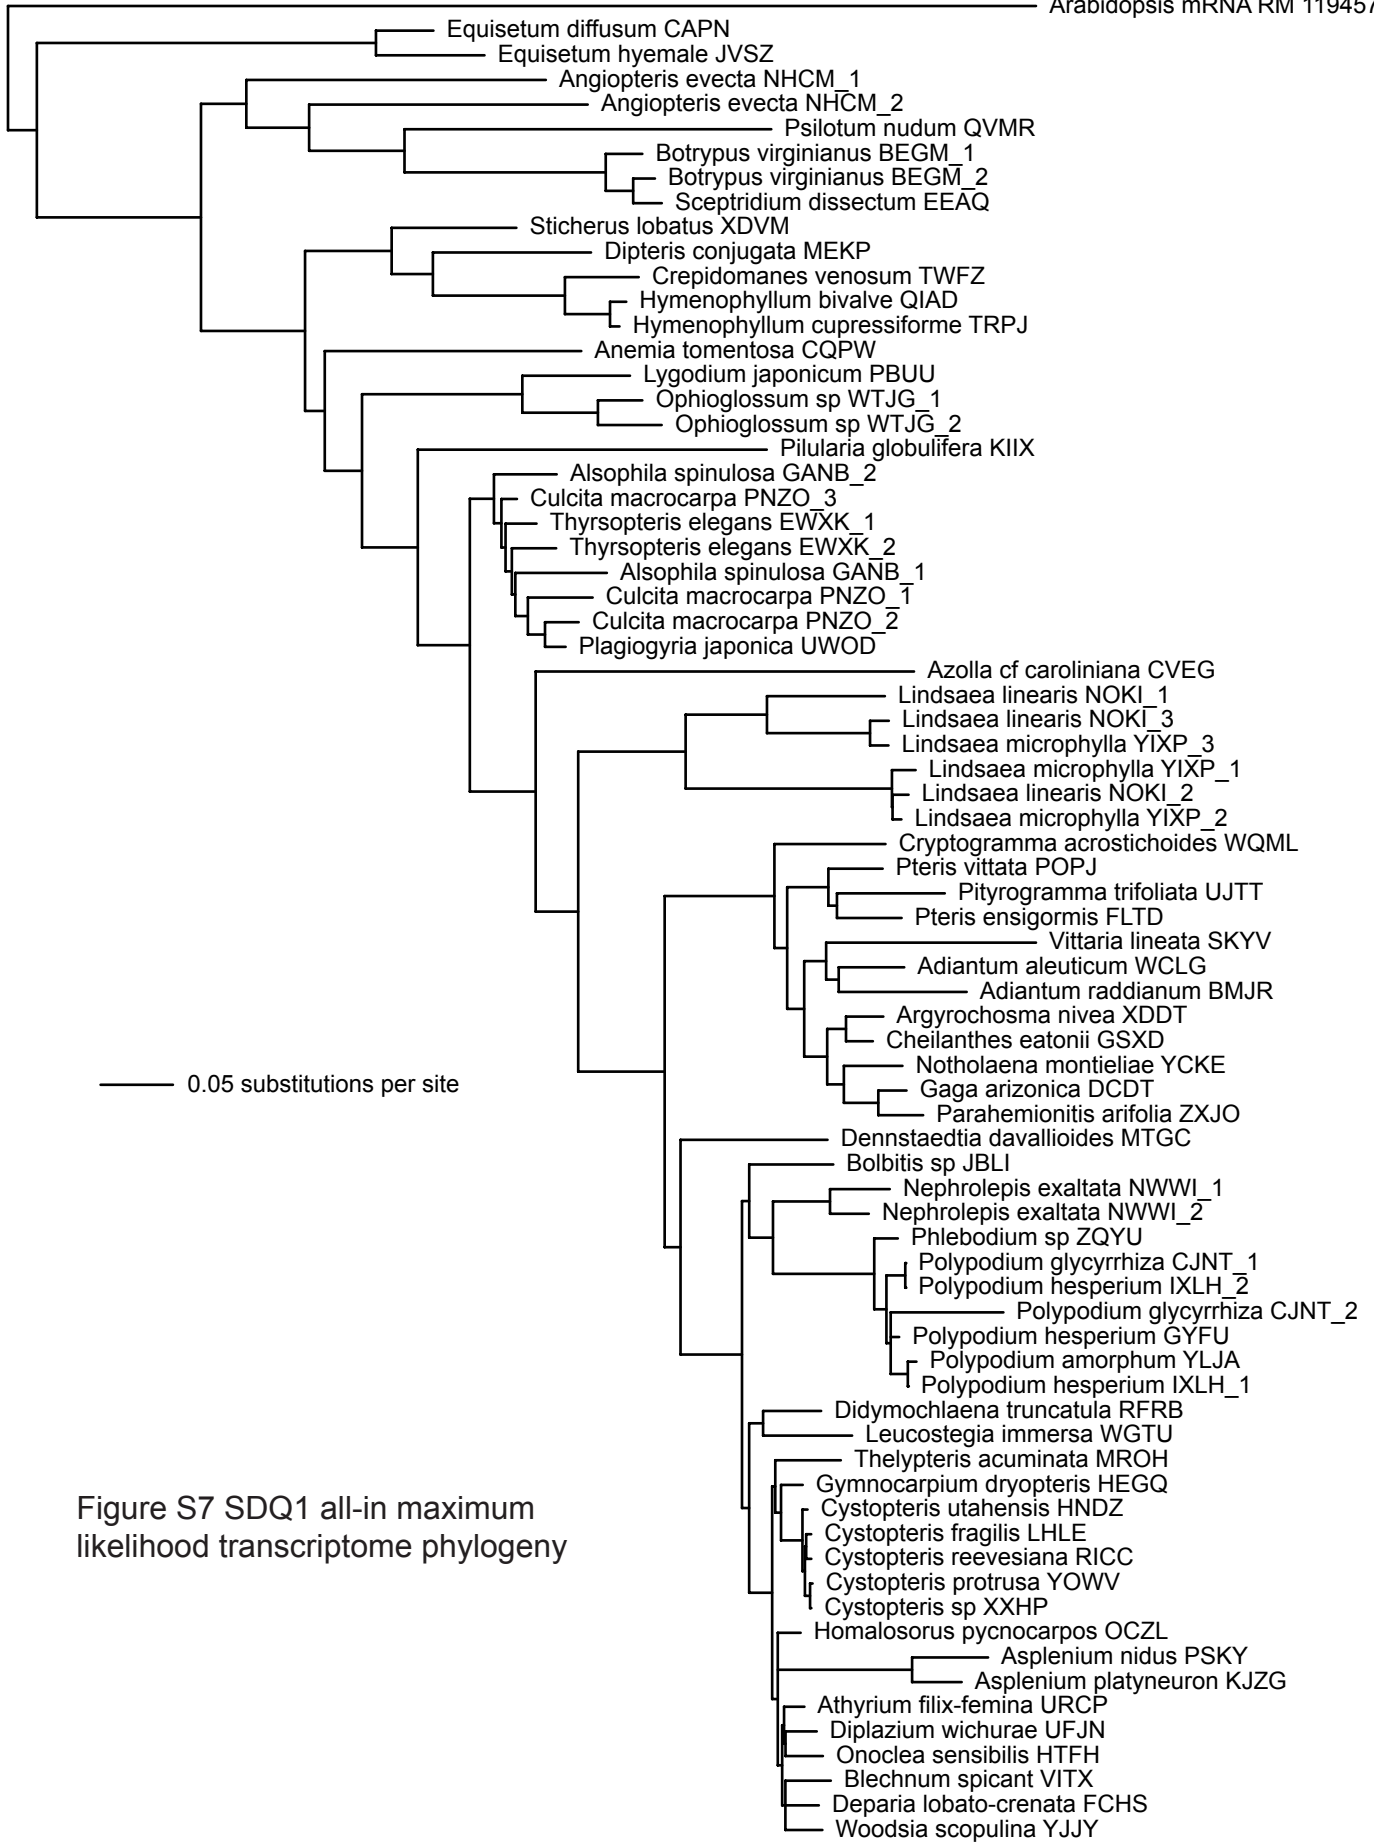

Figure S7 SDQ1 all-in maximum likelihood transcriptome phylogeny
